# Supplementary material for: Anticancer Potential of Resveratrol, β-Lapachone and Their Analogues
Source: MDPI journal article supplement (doi:10.3390/molecules25040893), 2020-02-18
Supplement: s1 [file s1]

**Supplementary Table 1.** Bioactivity prediction (druglikeness\*) of  $\beta$ -lapachone and its derivatives for specific biological activities

| Compound                         | GPCR ligand | Ion channel modulator | Kinase inhibitor | Nuclear receptor ligand | Protease inhibitor | Enzyme inhibitor |
|----------------------------------|-------------|-----------------------|------------------|-------------------------|--------------------|------------------|
| Lapachol                         | -0.17       | 0.27                  | -0.11            | 0.20                    | -0.09              | 0.65             |
| $\beta$ -lapachone               | -0.08       | 0.33                  | -0.25            | 0.07                    | 0.08               | 0.45             |
| $\alpha$ -lapachone              | -0.24       | -0.12                 | -0.29            | 0.14                    | -0.18              | 0.26             |
| 3-iodo- $\beta$ -lapachone       | -0.13       | 0.20                  | -0.21            | 0.03                    | 0.01               | 0.50             |
| 3-I- $\alpha$ -lapachone         | -0.28       | -0.24                 | -0.24            | 0.09                    | -0.24              | 0.32             |
| naphtho[2,1-d]oxazole-4,5-diones | -0.39       | -0.21                 | -0.44            | -0.46                   | -0.54              | 0.26             |

\*Druglikeness scores were calculated using molinspiration chemoinformatics pharmacological database (<https://www.molinspiration.com/cgi-bin/properties>).

**Supplementary Table 2.** Bioactivity prediction (druglikeness\*) of resveratrol and its derivatives for specific biological activities

| Compound                                                    | GPCR ligand | Ion channel modulator | Kinase inhibitor | Nuclear receptor ligand | Protease inhibitor | Enzyme inhibitor |
|-------------------------------------------------------------|-------------|-----------------------|------------------|-------------------------|--------------------|------------------|
| <b>Resveratrol and Methoxylated Resveratrol Derivatives</b> |             |                       |                  |                         |                    |                  |
| Resveratrol                                                 | -0.20       | 0.02                  | -0.20            | 0.01                    | -0.41              | 0.02             |
| Pterostilbene                                               | -0.13       | -0.06                 | -0.12            | 0.08                    | -0.33              | 0.01             |
| Trimethoxystilbene                                          | -0.14       | -0.12                 | -0.13            | -0.02                   | -0.29              | -0.05            |
| Tetramethoxystilbene                                        | -0.08       | -0.14                 | -0.08            | 0.05                    | -0.22              | -0.07            |
| Pentamethoxystilbene                                        | -0.07       | -0.13                 | -0.02            | -0.04                   | -0.17              | -0.05            |
| <b>Hydroxylated Resveratrol Derivatives</b>                 |             |                       |                  |                         |                    |                  |
| Dihydroxystilbene                                           | -0.27       | 0.04                  | -0.27            | -0.11                   | -0.47              | -0.01            |
| Tetrahydroxystilbene                                        | -0.16       | -0.02                 | -0.14            | 0.08                    | -0.36              | 0.04             |
| Hexahydroxystilbene                                         | -0.30       | 0.04                  | -0.19            | -0.19                   | -0.33              | 0.05             |

\*Druglikeness scores were calculated using molinspiration chemoinformatics pharmacological database(<https://www.molinspiration.com/cgi-bin/properties>).

**Supplementary Table 3.** Chemical and pharmacological properties of Lapachol,  $\beta$ -lapachone and derivatives.

| Compound                         | PubChem CID | Molecular Formula                               | Molecular Mass (Da) | logP | tPSA (Å <sup>2</sup> ) | nrotb | Lipinski's rule violations | Molecular volume (Å <sup>3</sup> ) | Canonical SMILES                                         |
|----------------------------------|-------------|-------------------------------------------------|---------------------|------|------------------------|-------|----------------------------|------------------------------------|----------------------------------------------------------|
| Lapachol                         | 3884        | C <sub>15</sub> H <sub>14</sub> O <sub>3</sub>  | 242.27              | 3.16 | 54.37                  | 2     | 0                          | 223.94                             | <chem>CC(=CCC1=C(C2=CC=CC=C2C(=O)C1=O)O)C</chem>         |
| $\beta$ -lapachone               | 3885        | C <sub>15</sub> H <sub>14</sub> O <sub>3</sub>  | 242.27              | 2.95 | 43.38                  | 0     | 0                          | 219.96                             | <chem>CC1(CCC2=C(O1)C3=CC=CC=C3C(=O)C2=O)C</chem>        |
| $\alpha$ -lapachone              | 72732       | C <sub>15</sub> H <sub>14</sub> O <sub>3</sub>  | 242.27              | 2.95 | 43.38                  | 0     | 0                          | 219.96                             | <chem>CC1(CCC2=C(O1)C(=O)C3=CC=CC=C3C2=O)C</chem>        |
| 3-iodo- $\beta$ -lapachone       | N.A.        | C <sub>15</sub> H <sub>13</sub> IO <sub>3</sub> | 368.17              | 3.43 | 43.38                  | 0     | 0                          | 243.97                             | <chem>C1=C2C(=CC=C1)C3=C(C(C2=O)=O)CC(C(C)(C)O3)I</chem> |
| 3-I- $\alpha$ -lapachone         | N.A.        | C <sub>15</sub> H <sub>13</sub> IO <sub>3</sub> | 368.17              | 3.43 | 43.38                  | 0     | 0                          | 243.97                             | <chem>C1=C2C(=CC=C1)C(C3=C(C2=O)OC(C(C3)I)(C)C)=O</chem> |
| naphtho[2,1-d]oxazole-4,5-diones | N.A.        | C <sub>13</sub> H <sub>9</sub> NO <sub>3</sub>  | 227.22              | 2.16 | 60.17                  | 1     | 0                          | 227.22                             | <chem>C1(C(C3=C(C2=C1C=CC=C2)OC(=N3)CC)=O)=O</chem>      |

N.A. compounds not available at Pubchem database. logP values, tPSA (topological polar surface area), nrotb (rotatable bonds), Lipinski's rule violations and molecular volume were extracted from molinspiration cheminformatics pharmacological database(<https://www.molinspiration.com/cgi-bin/properties>) after insertion of Canonical SMILES representation of each compound. Canonical Smiles were collected from PubChem database.

**Supplementary Table 4.** Chemical and pharmacological properties of resveratrol and derivatives.

| Compound                                                    | PubChem CID | Molecular Formula | Molecular Weight | logP | Total polar surface area | Rotatable bonds | Rule of five violations | Molecular volume | Canonical SMILES                                           |
|-------------------------------------------------------------|-------------|-------------------|------------------|------|--------------------------|-----------------|-------------------------|------------------|------------------------------------------------------------|
| <b>Resveratrol and Resveratrol Methoxylated Derivatives</b> |             |                   |                  |      |                          |                 |                         |                  |                                                            |
| <b>Resveratrol</b>                                          | 445154      | C14H12O3          | 228.24           | 2.99 | 60.68                    | 2               | 0                       | 206.92           | <chem>C1=CC(=CC=C1C=CC2=CC(=CC(=C2)O)O)O</chem>            |
| <b>Pterostilbene</b>                                        | 5281727     | C16H16O3          | 256.3            | 4.06 | 38.70                    | 4               | 0                       | 241.98           | <chem>COC1=CC(=CC(=C1)C=CC2=CC=C(C=C2)O)OC</chem>          |
| <b>Trimethoxystilbene</b>                                   | 5388063     | C17H18O3          | 270.32           | 4.59 | 27.70                    | 5               | 0                       | 259.51           | <chem>COC1=CC=C(C=C1)C=CC2=CC(=CC(=C2)OC)OC</chem>         |
| <b>Tetramethoxystilbene</b>                                 | 5354004     | C18H20O4          | 300.3            | 4.40 | 36.94                    | 6               | 0                       | 285.05           | <chem>COC1=CC(=C(C=C1)C=CC2=CC(=CC(=C2)OC)OC)OC</chem>     |
| <b>Pentamethoxystilbene</b>                                 | 9818893     | C19H22O5          | 330.4            | 4.17 | 46.17                    | 7               | 0                       | 310.60           | <chem>COC1=CC(=CC(=C1)C=CC2=CC(=C(C(=C2)OC)OC)OC)OC</chem> |
| <b>Hydroxylated Resveratrol Derivatives</b>                 |             |                   |                  |      |                          |                 |                         |                  |                                                            |
| <b>Dihydroxystilbene</b>                                    | 5282363     | C14H12O2          | 212.24           | 3.54 | 40.46                    | 2               | 0                       | 198.91           | <chem>C1=CC(=CC=C1C=CC2=CC=C(C=C2)O)O</chem>               |
| <b>Tetrahydroxystilbene</b>                                 | 5281717     | C14H12O4          | 244.24           | 2.72 | 80.91                    | 2               | 0                       | 214.94           | <chem>C1=CC(=C(C=C1O)O)C=CC2=CC(=CC(=C2)O)O</chem>         |
| <b>Hexahydroxystilbene</b>                                  | 129837003   | C14H12O6          | 276.24           | 3.37 | 121.37                   | 2               | 1                       | 230.98           | <chem>C1=CC=C(C=C1)C=C(C2=C(C(=C(C(=C2O)O)O)O)O)O</chem>   |

logP values, tPSA (topological polar surface area), nrotb (rotatable bonds), Lipinski's rule violations and molecular volume were extracted from molinspiration cheminformatics pharmacological database(<https://www.molinspiration.com/cgi-bin/properties>) after insertion of Canonical SMILES representation of each compound. Canonical Smiles were collected from PubChem database.
